# Supplementary material for: The correlation of dust and gas emission in star-forming environments
Source: Oxford University Press journal article supplement (doi:10.1093/mnras/stu362), 2014-03-01
Supplement: 1028745_Supplementary_Data.zip [file 1028745_Supplementary_Data.zip]

Archive with 1 entries (1 files):
- Online_Material.pdf
