# Supplementary material for: The correlation of dust and gas emission in star-forming environments
Source: Oxford University Press journal article supplement (doi:10.1093/mnras/stu362), 2014-03-01
Supplement: 1028745_Supplementary_Data.zip [file 1028745_Supplementary_Data.zip › Online_Material.pdf]

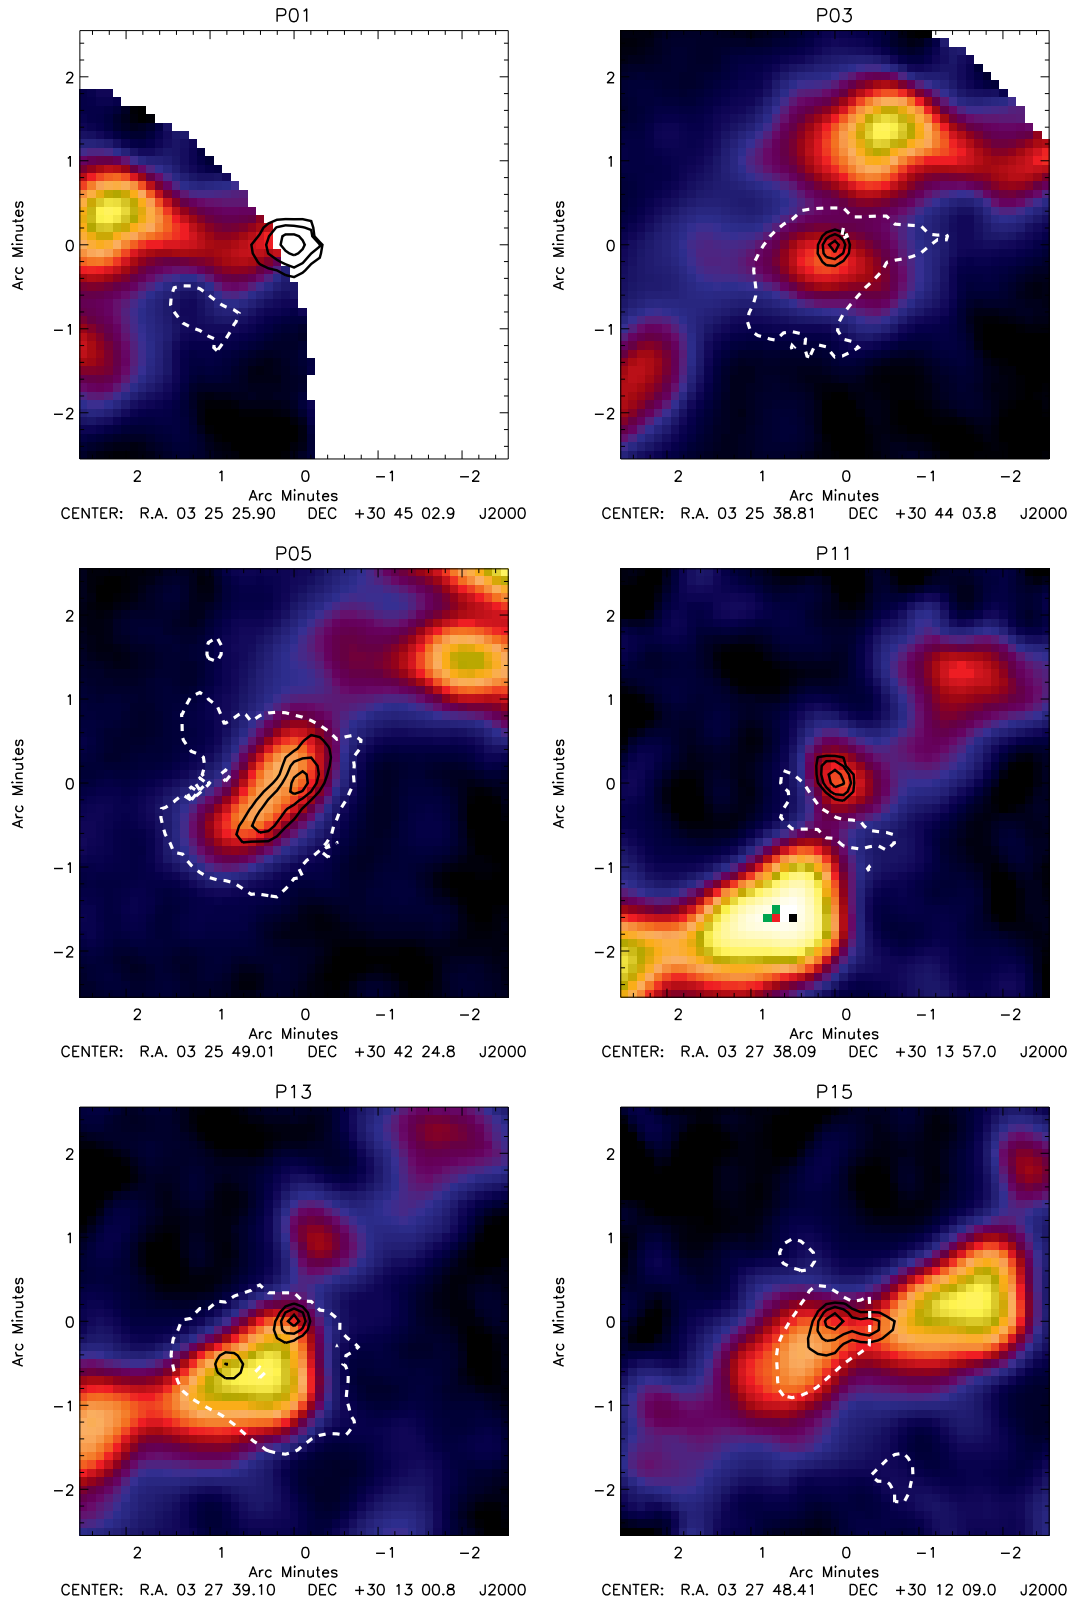

**Figure 11.**  $\text{NH}_3$  integrated intensity in sources P01, P03, P05, P11, P13 & P15, overlaid with black contours of submillimetre emission at 50, 70 and 90% of the peak flux density. A white, broken contour traces the 50% level of the  $\text{NH}_3$  column density distribution.

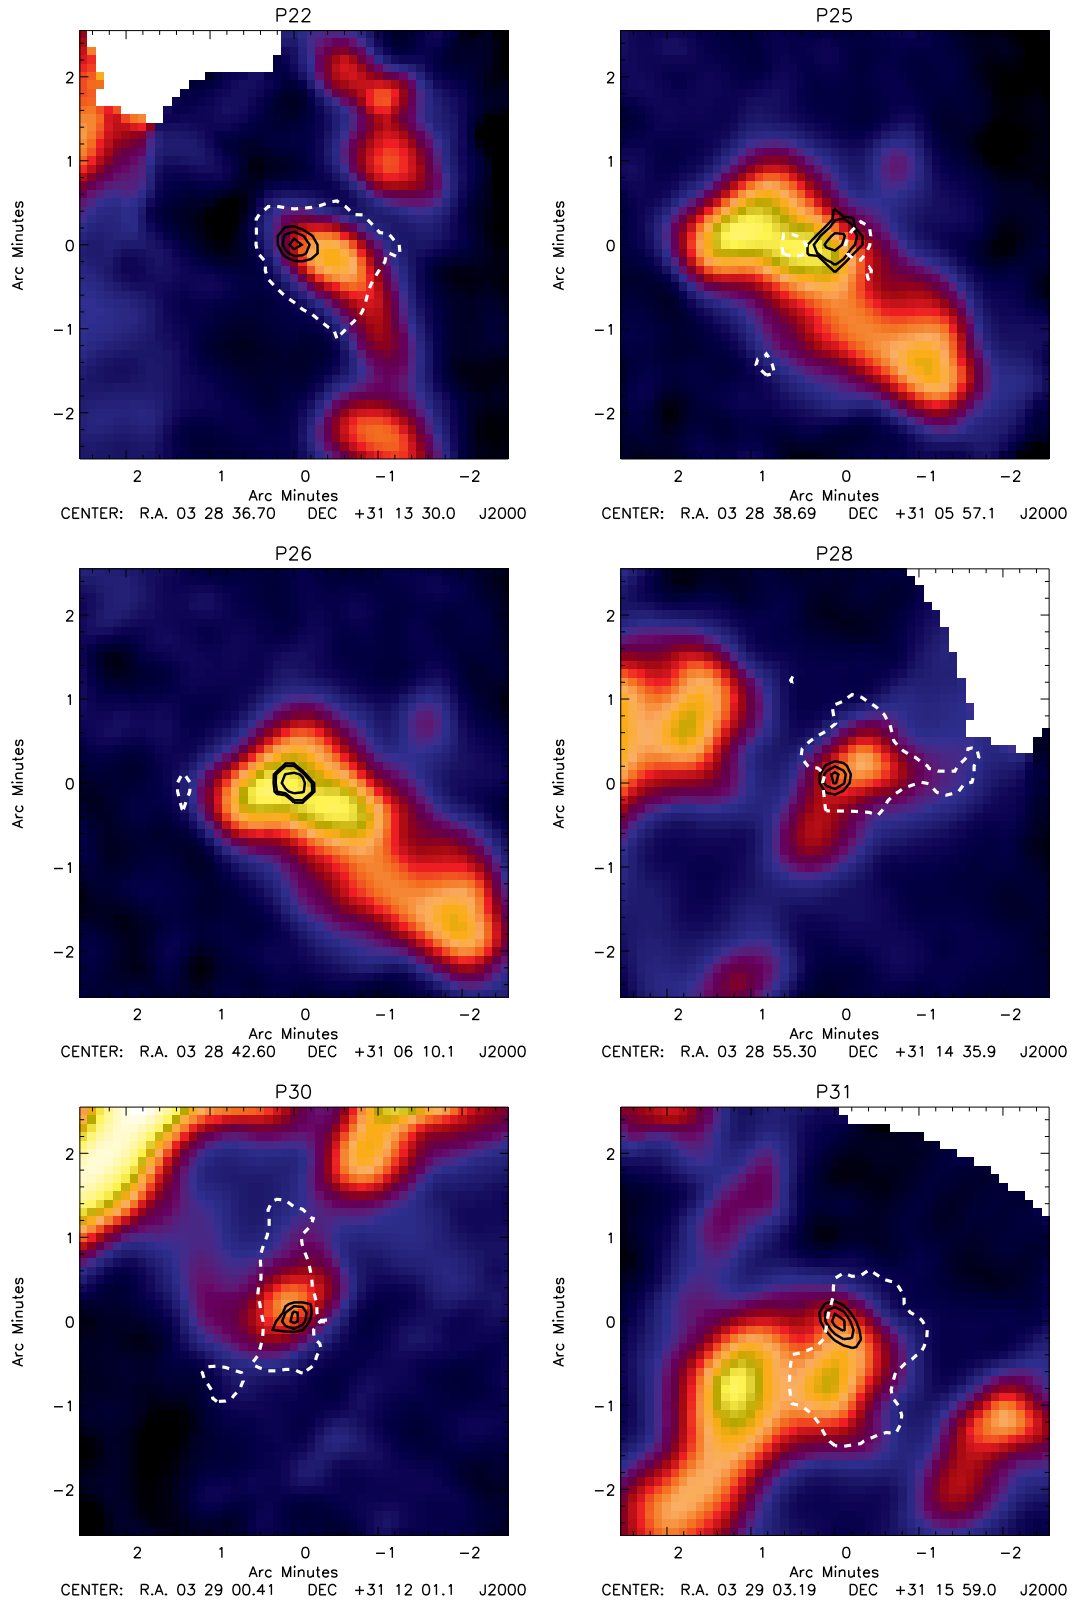

**Figure 11.**  $\text{NH}_3$  integrated intensity in sources P22, P25, P26, P28, P30 & P31, overlaid with black contours of submillimetre emission at 50, 70 and 90% of the peak flux density. A white, broken contour traces the 50% level of the  $\text{NH}_3$  column density distribution.

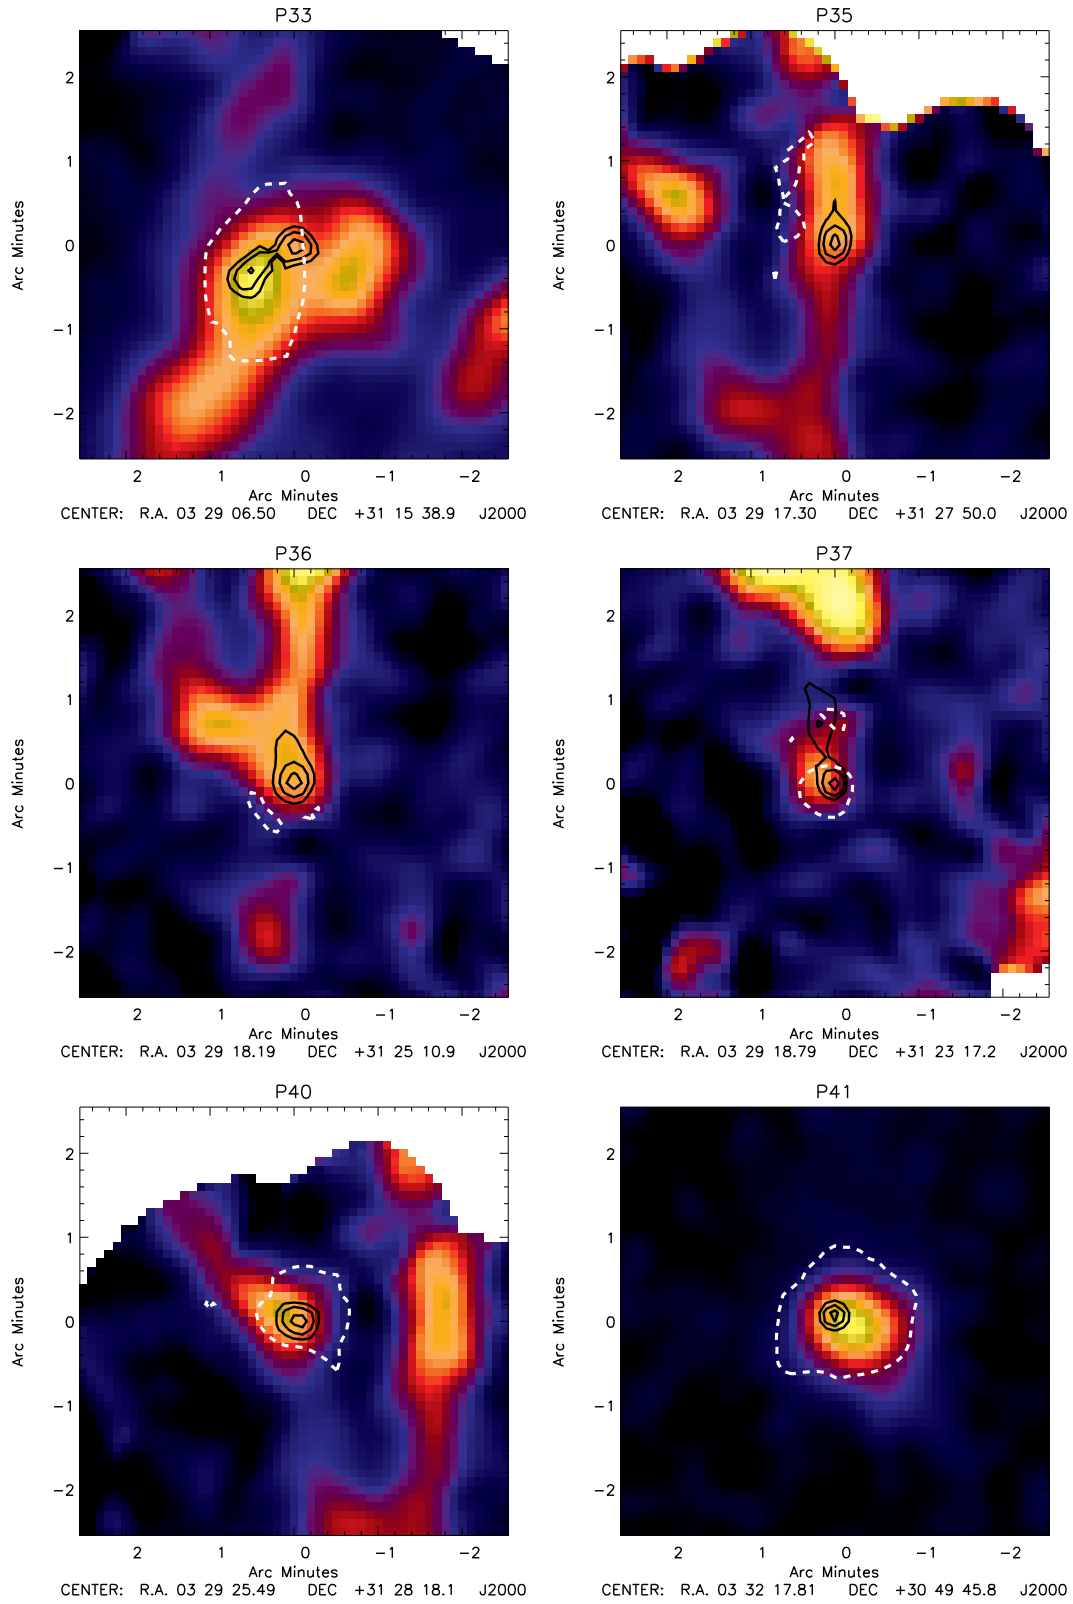

**Figure 11.**  $\text{NH}_3$  integrated intensity in sources P33, P35, P36, P37, P40 & P41, overlaid with black contours of submillimetre emission at 50, 70 and 90% of the peak flux density. A white, broken contour traces the 50% level of the  $\text{NH}_3$  column density distribution.

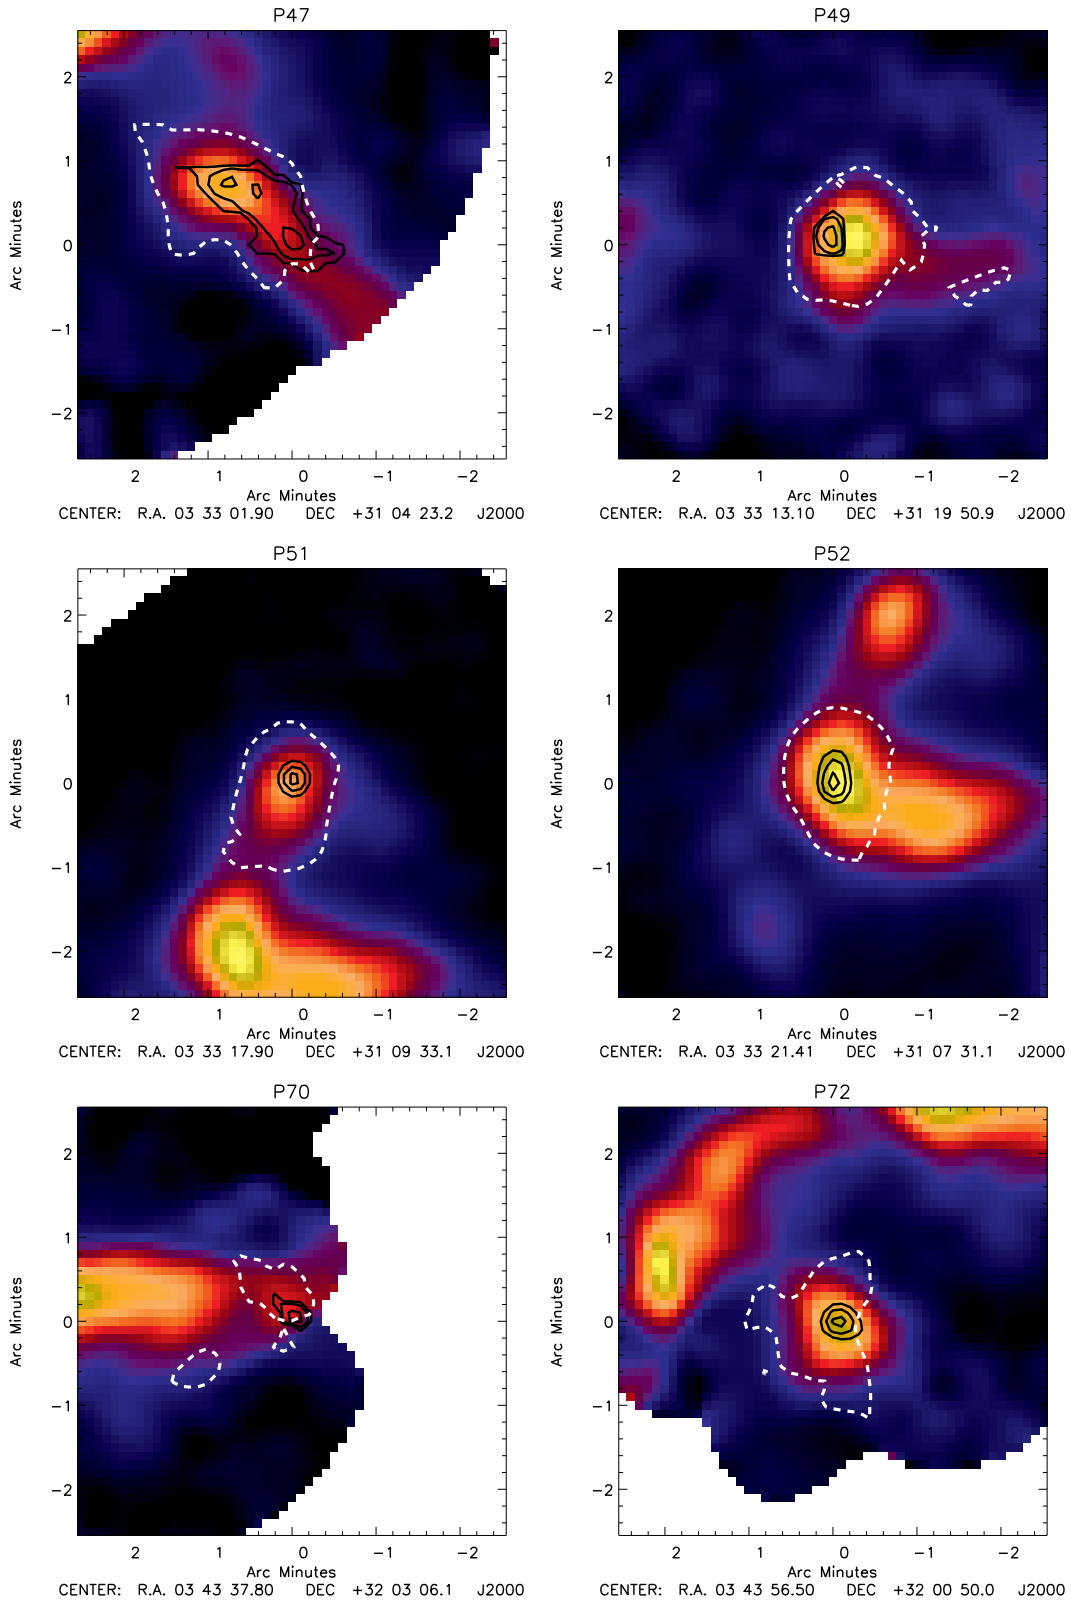

**Figure 11.**  $\text{NH}_3$  integrated intensity in sources P47, P49, P51, P52, P70 & P72, overlaid with black contours of submillimetre emission at 50, 70 and 90% of the peak flux density. A white, broken contour traces the 50% level of the  $\text{NH}_3$  column density distribution.

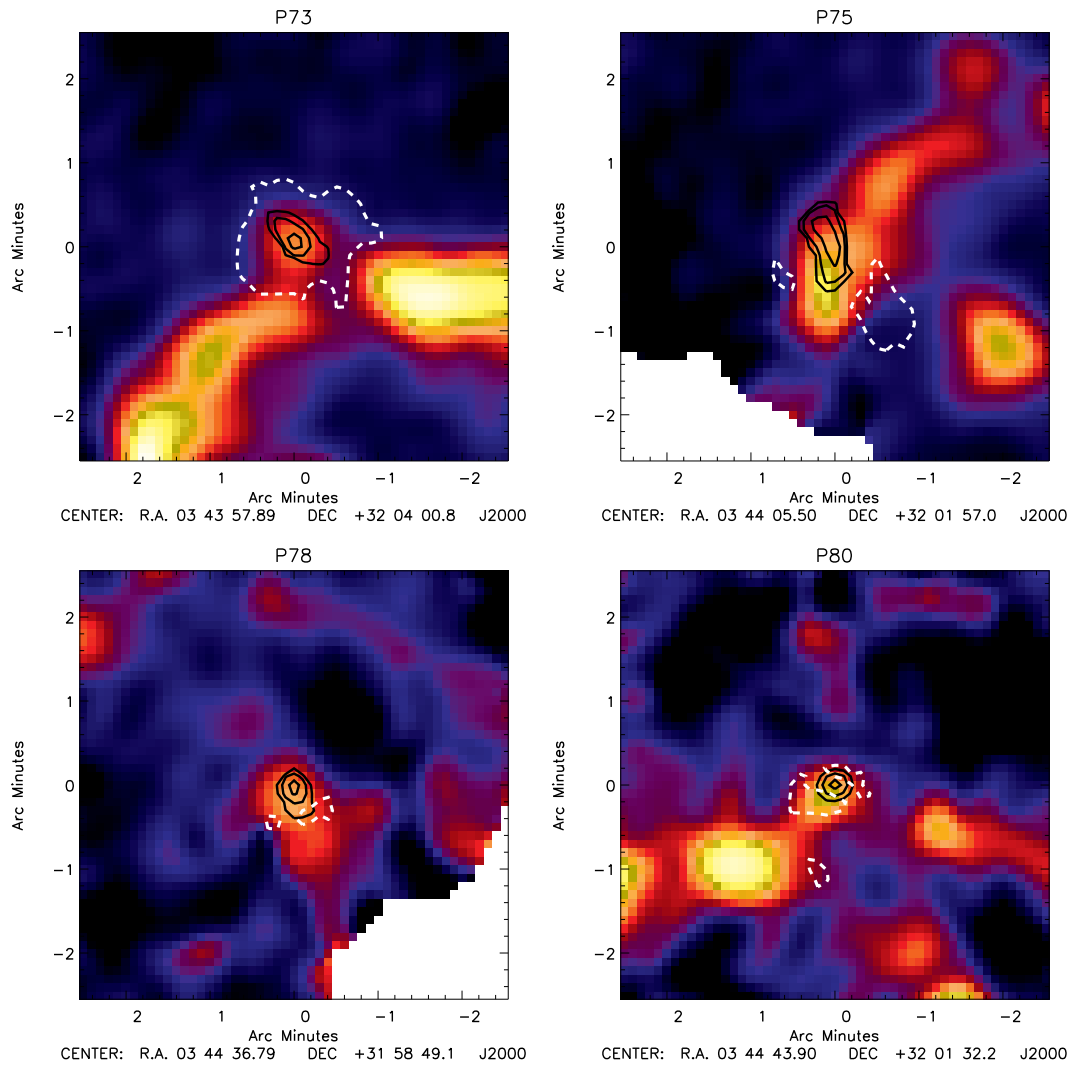

**Figure 11.**  $\text{NH}_3$  integrated intensity in sources P73, P75, P78 & P80, overlaid with black contours of submillimetre emission at 50, 70 and 90% of the peak flux density. A white, broken contour traces the 50% level of the  $\text{NH}_3$  column density distribution.

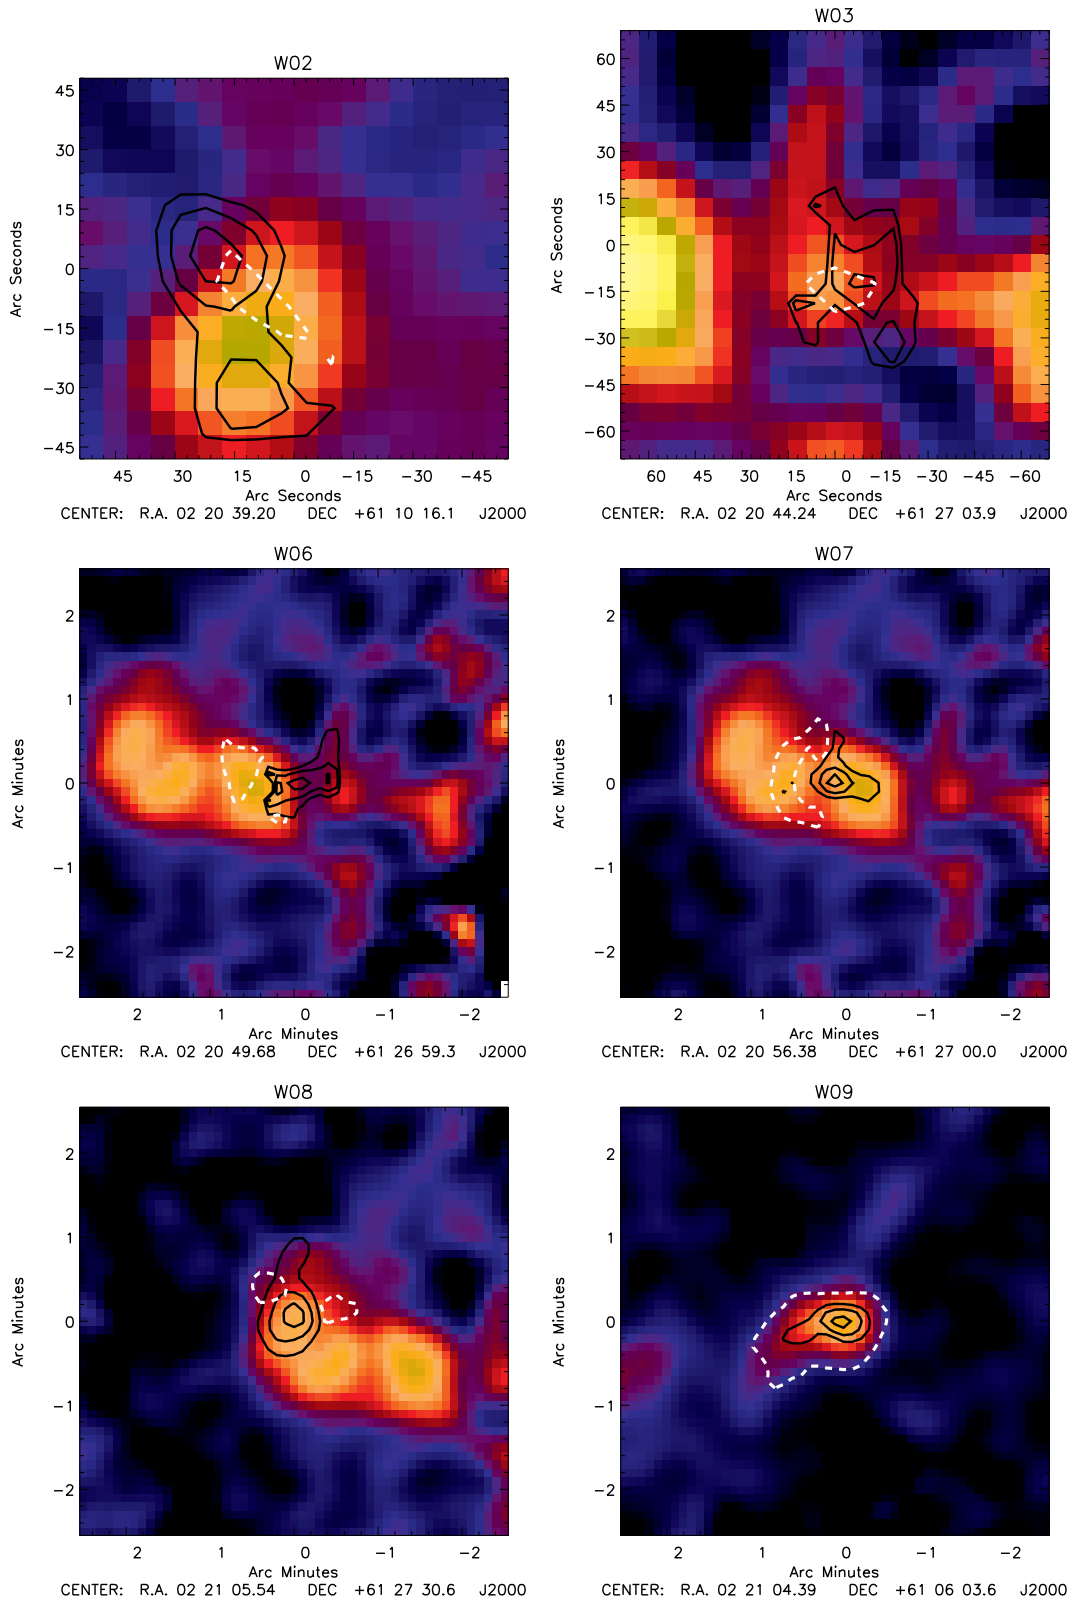

**Figure 11.**  $\text{NH}_3$  integrated intensity in sources W02, W03, W06, W07, W08 & W09 overlaid with black contours of submillimetre emission at 50, 70 and 90% of the peak flux density. A white, broken contour traces the  $\text{NH}_3$  column density distribution at a level of 50% of the local peak for all sources except W02 and W07, for which the contour levels are 70% and 40%, respectively.

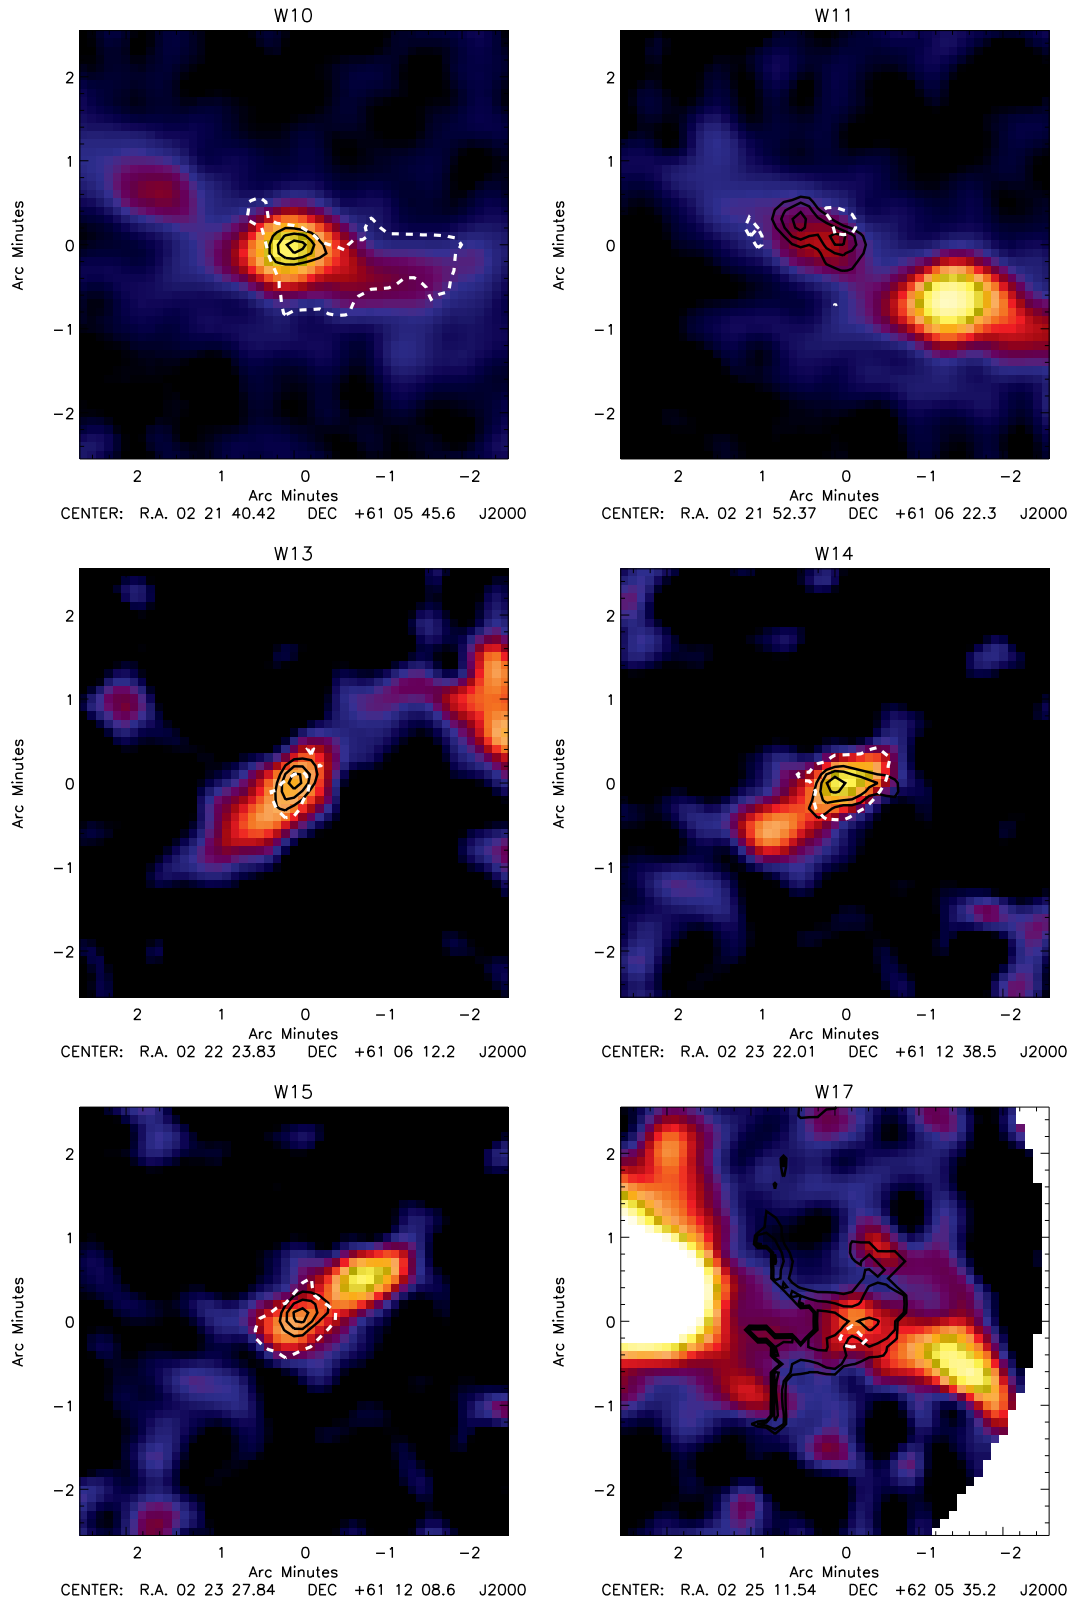

**Figure 11.**  $\text{NH}_3$  integrated intensity in sources W10, W11, W13, W14, W15 & W17 overlaid with black contours of submillimetre emission at 50, 70 and 90% of the peak flux density. A white, broken contour traces the 50% level of the  $\text{NH}_3$  column density distribution.

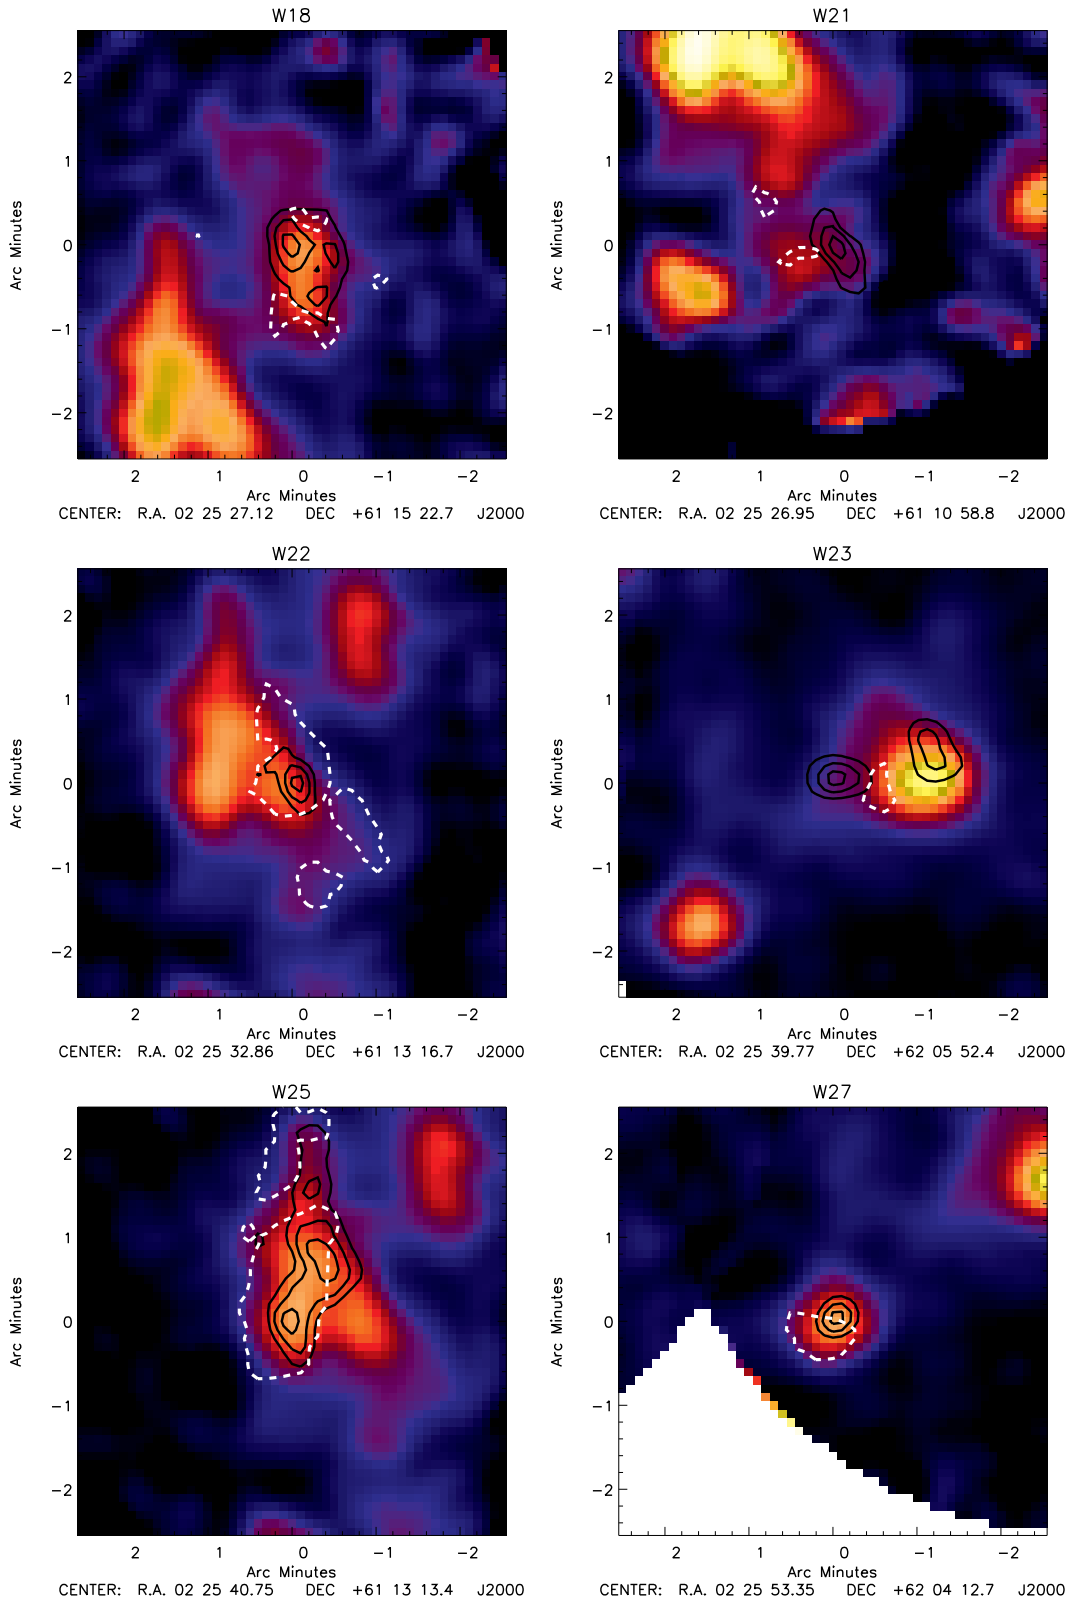

**Figure 11.**  $\text{NH}_3$  integrated intensity in sources W18, W21, W22, W23, W25 & W27 overlaid with black contours of submillimetre emission at 50, 70 and 90% of the peak flux density. A white, broken contour traces the  $\text{NH}_3$  column density distribution at a level of 50% of the local peak for all sources except W18 and W22, for which the contour levels are 40% and 20%, respectively.

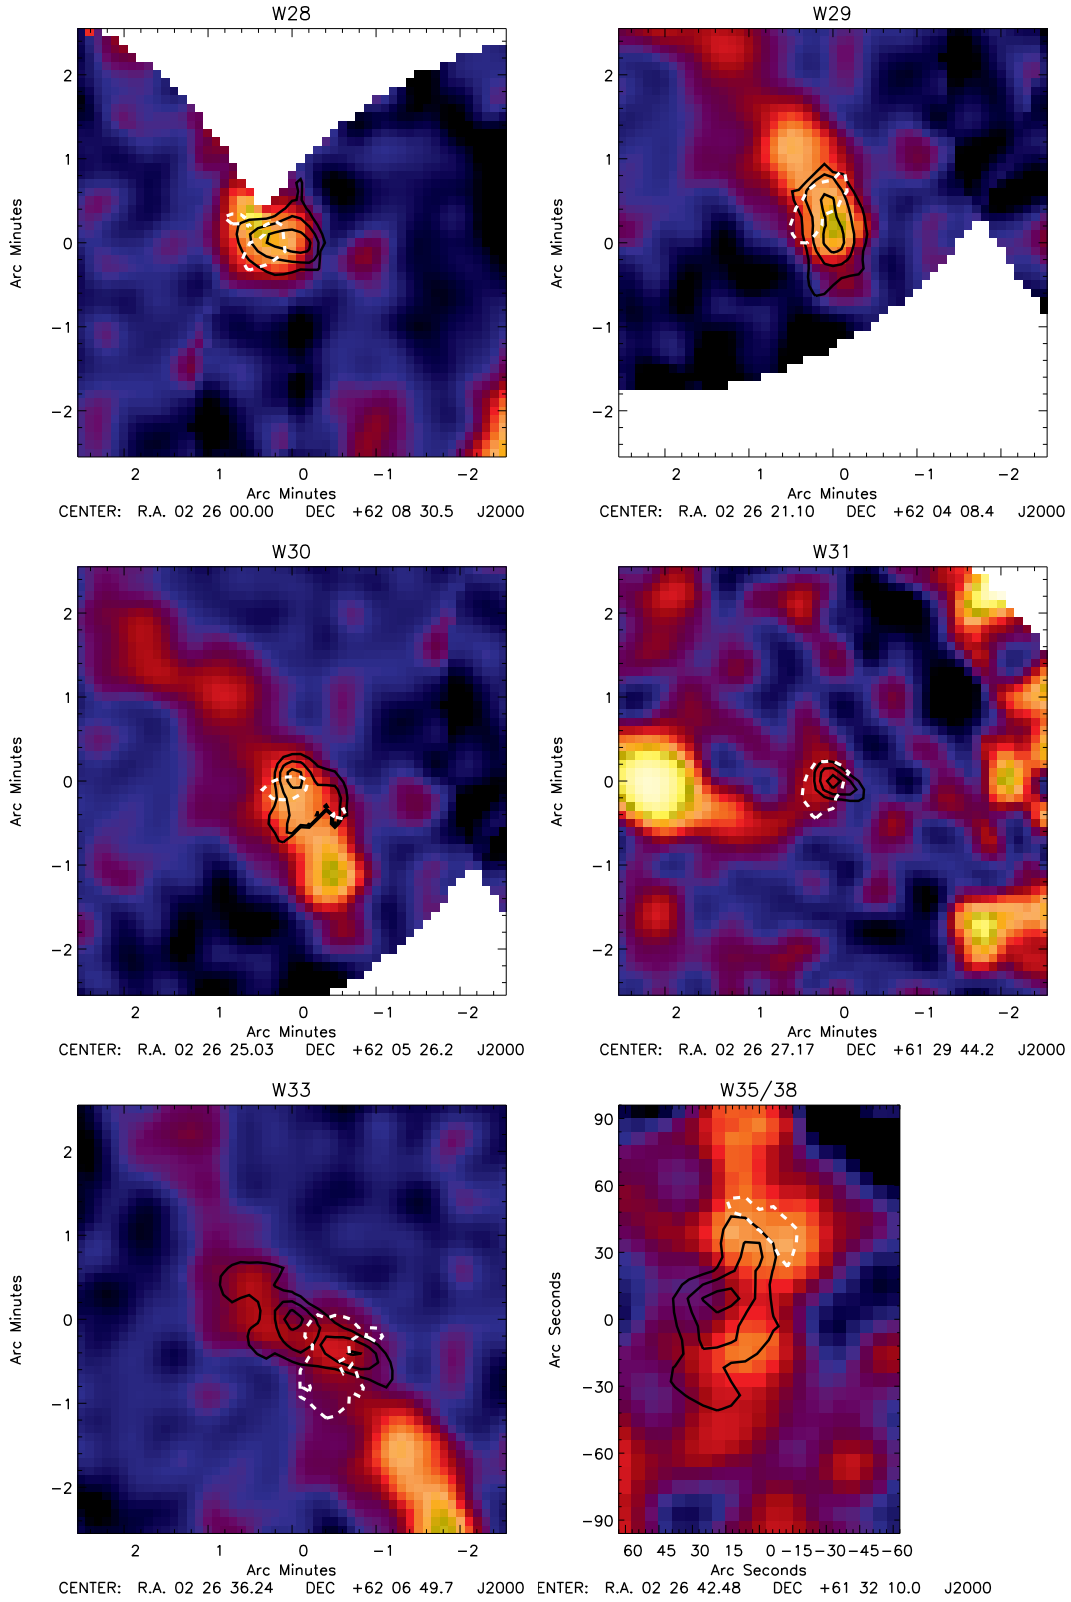

**Figure 11.**  $\text{NH}_3$  integrated intensity in sources W28, W29, W30, W31, W33 & W3538 overlaid with black contours of submillimetre emission at 50, 70 and 90% of the peak flux density. A white, broken contour traces the  $\text{NH}_3$  column density distribution at a level of 50% of the local peak for the sources W30 and W31. For W28, W29, W33 and W3538 the contour is at 30%

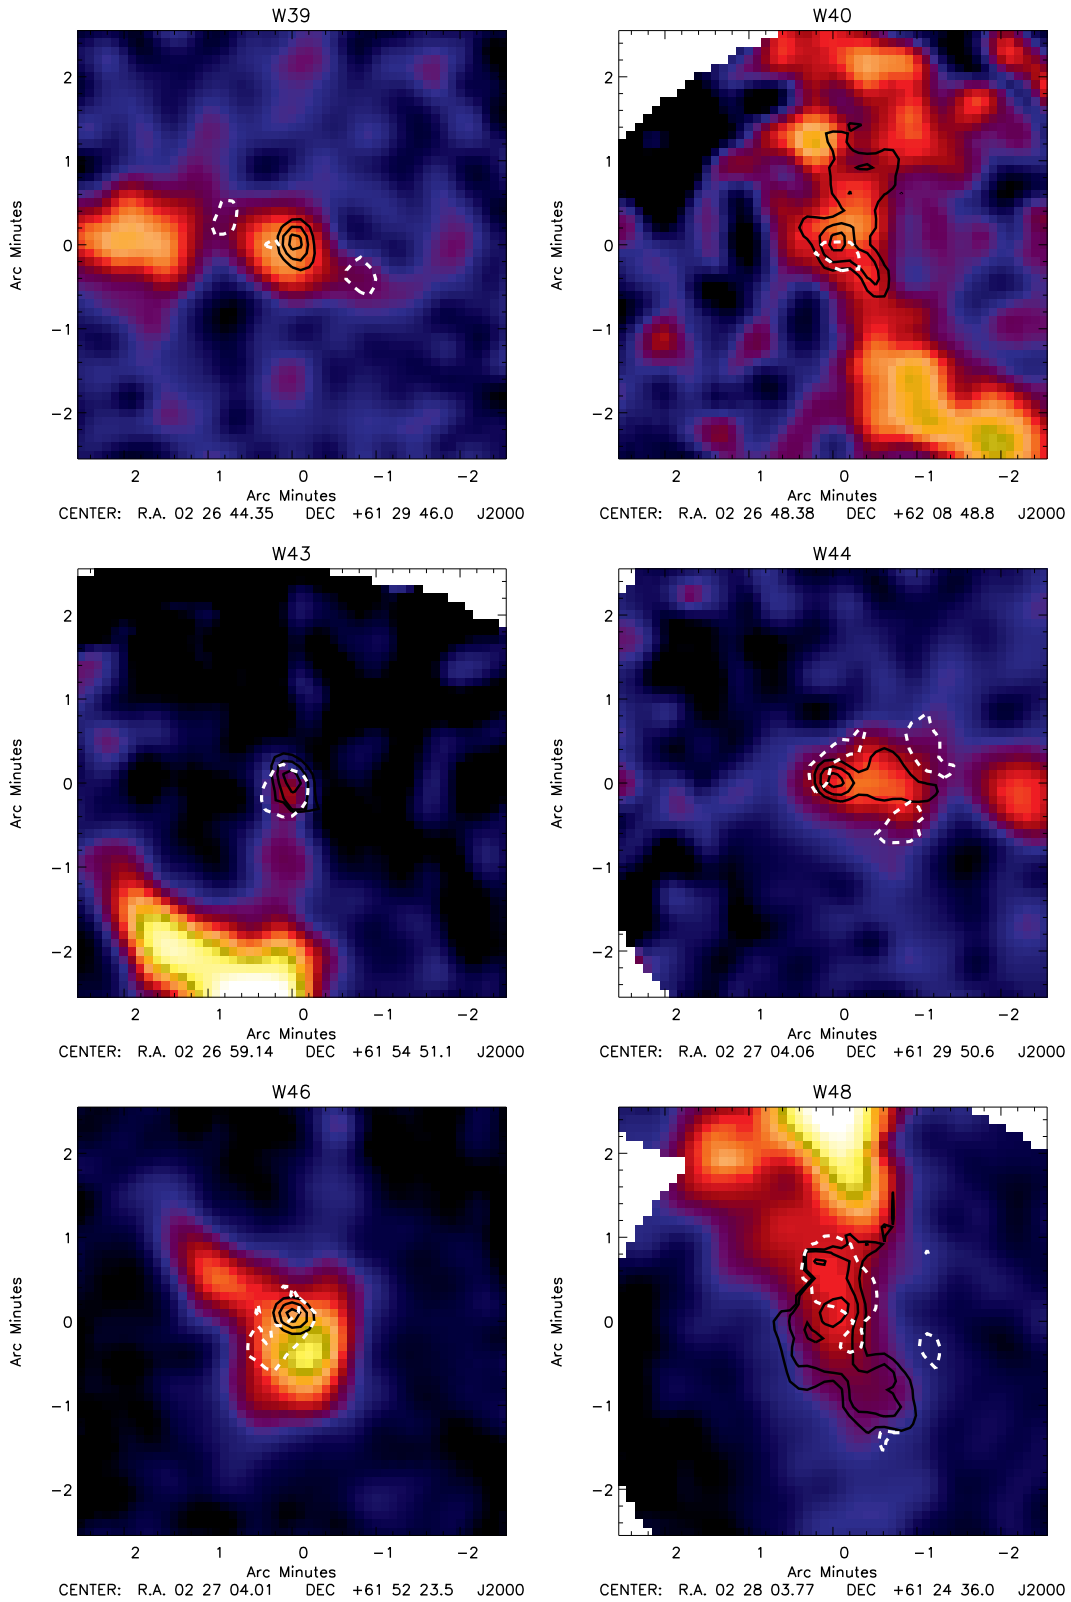

**Figure 11.**  $\text{NH}_3$  integrated intensity in sources W39, W40, W43, W44, W46 & 48 overlaid with black contours of submillimetre emission at 50, 70 and 90% of the peak flux density. A white, broken contour traces the  $\text{NH}_3$  column density distribution at a level of 50% of the local peak for the sources W40, W45 and W46. For W39, W43 and W44 the contour is at 30%

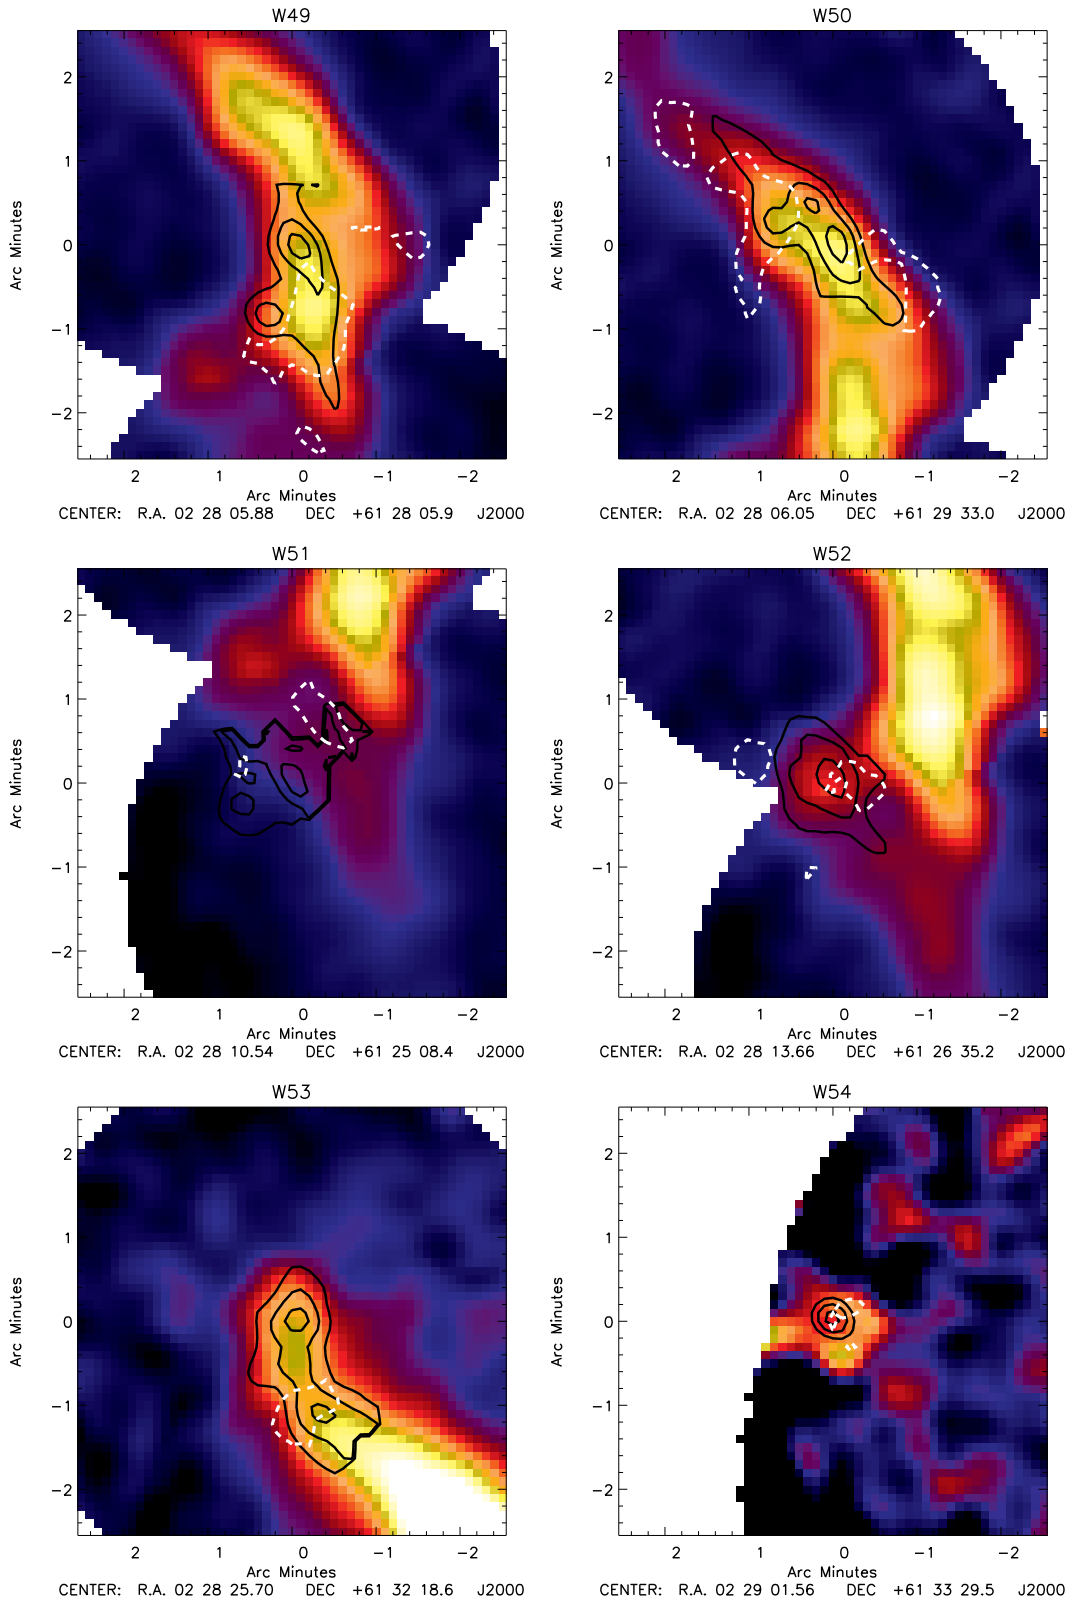

**Figure 11.**  $\text{NH}_3$  integrated intensity in sources W49, W50, W51, W52, W53 & W54 overlaid with black contours of submillimetre emission at 50, 70 and 90% of the peak flux density. A white, broken contour traces the  $\text{NH}_3$  column density distribution at a level of 50% of the local peak for all sources except W50, for which the contour level is at 30%
